# Supplementary material for: Two domain-disrupted hda6 alleles have opposite epigenetic effects on transgenes and some endogenous targets
Source: Sci Rep. 2015 Dec 15;5:17832. doi: 10.1038/srep17832 (PMC4678874; doi:10.1038/srep17832)
Supplement: Supplementary Information [file srep17832-s1.pdf]

# **Two domain-disrupted hda6 alleles have opposite epigenetic effects on transgenes and some endogenous targets**

**Shoudong Zhang<sup>1,5</sup>, Xiangqiang Zhan<sup>2</sup>, Xiaoming Xu<sup>3</sup>, Peng Cui<sup>5</sup>, Jian-Kang Zhu<sup>2,4</sup>, Yiji Xia<sup>1</sup> and Liming Xiong<sup>\*5</sup>**

<sup>1</sup> Department of Biology, Hong Kong Baptist University, Hong Kong, Hong Kong SAR, China. <sup>2</sup> Shanghai Center for Plant Stress Biology, Chinese Academy of Sciences, Shanghai, China. <sup>3</sup> College of life sciences, Nanjing Agricultural University, Nanjing, China. <sup>4</sup> Horticulture and Landscape Architecture, Purdue University, West Lafayette, IN 47907, USA. <sup>5</sup> Division of Biological and Environmental Sciences & Engineering, King Abdullah University of Science and Technology (KAUST), Thuwal, Saudi Arabia.

\* To whom correspondence should be addressed. [liming.xiong@kaust.edu.sa](mailto:liming.xiong@kaust.edu.sa) or [yxia@hkbu.edu.hk](mailto:yxia@hkbu.edu.hk)

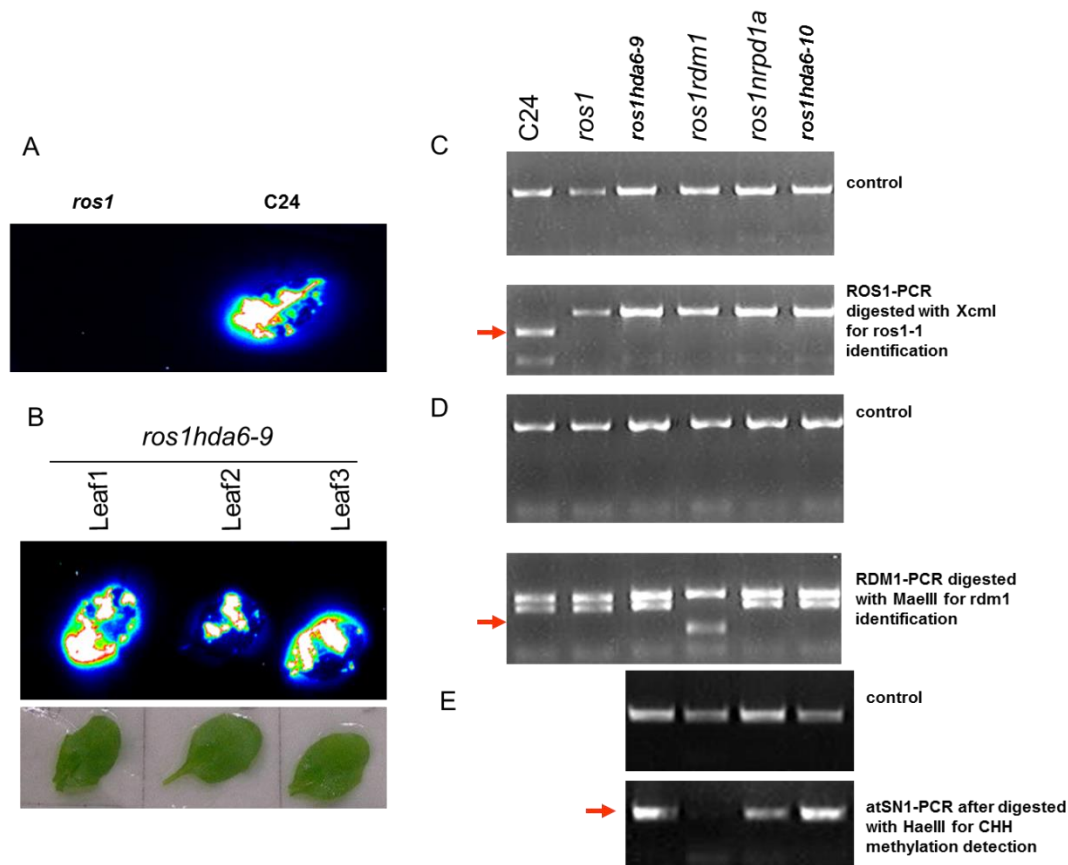

Figure S1. Identification and characterization of the *hda6-9* mutant. (A) *LUC* phenotypes of the wild type and the *ros1-1* single mutant. (B) *LUC* expression of 250 mM NaCl treated *hda6-9* leaves for 3 hours. (C) Genotyping of *hda6-9* and *hda6-10* in the *ros1-1* background. (D) Examination of possible *RDM1* mutation in the *hda6-9* and *hda6-10* mutants. (E) AtSN1 CHH methylation status of *hda6-9* and *hda6-10*.

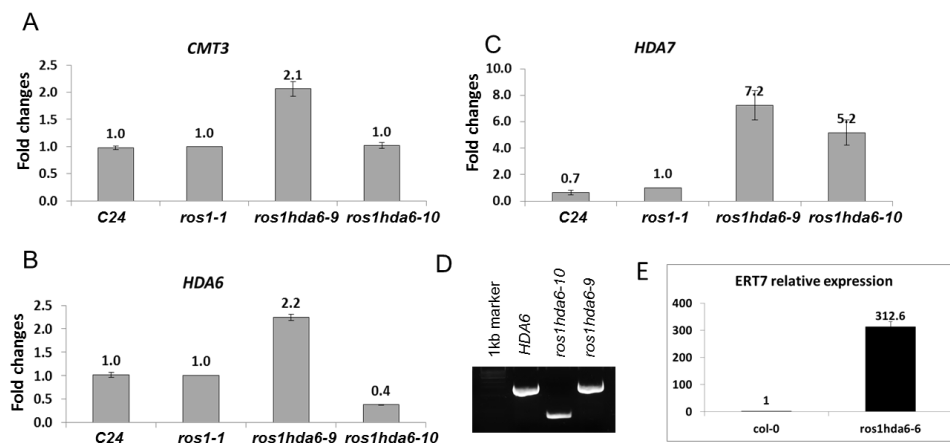

Figure S2. Expression of *CMT3*, *HDA6* and *HDA7* in *hda6* alleles. qRT-PCR detection of *CMT3*(A), *HDA6* (B) and *HDA7*(C) expression in wild type, *ros1-1*, *hda6-9* and *hda6-10*. (D) RT-PCR amplification of the full-length *HDA6* from *ros1-1*, mutated *hda6-10* from the *hda6-10* mutant, and mutated *hda6-9* from the *hda6-9* mutant. (E) RT-PCR amplification of *ERT7* from *COL-0*, mutated *ros1hda6-6*.

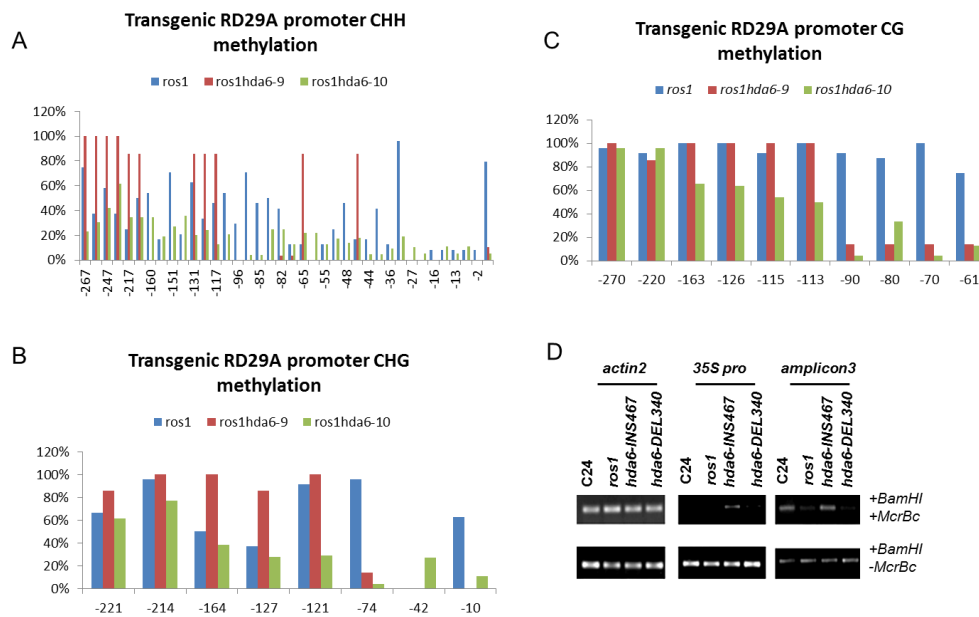

Figure S3. DNA methylation analysis on the *RD29A* promoter and the *35S* promoter. (A-C) Bisulfite sequencing to determine the transgenic *RD29A* promoter DNA methylation levels in *ros1-1*, *hda6-9* and *hda6-10* mutants. Numbers on the x-axis indicate the nucleotide positions upstream of the translation start site. (D) Chop PCR with *Bam*HI and a methylation dependent enzyme *Mcr*Bc digestion following PCR to determine the DNA methylation level.

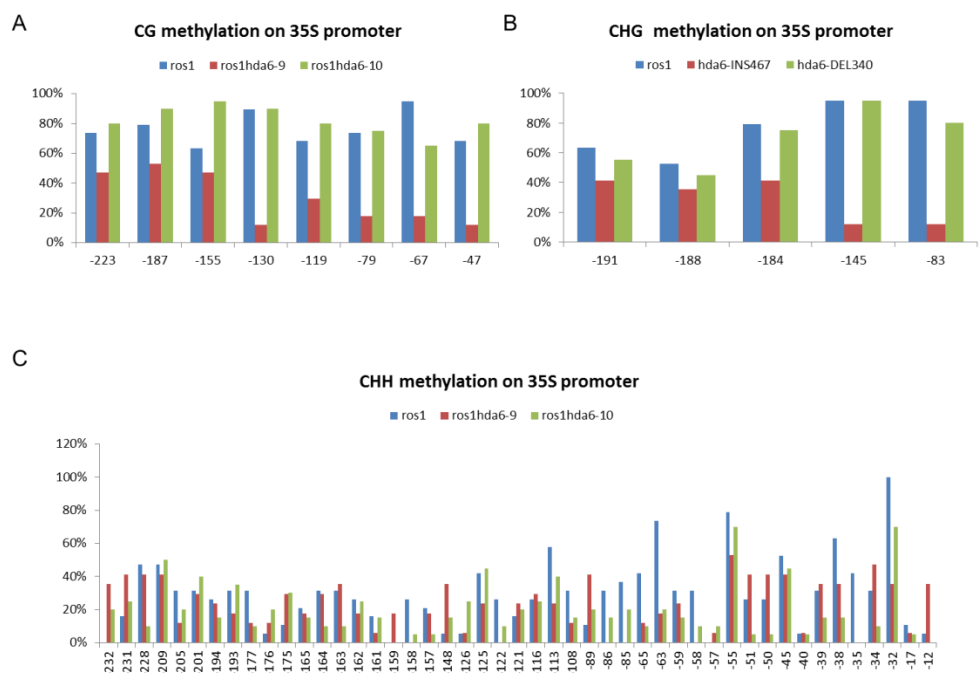

Figure S4. Bisulfite sequencing to determine the DNA methylation level of the 35S promoter. (A) CG methylation. (B) CHH methylation. (C) CHH methylation. Numbers on the x-axis indicate the nucleotide positions upstream of the translation start site.

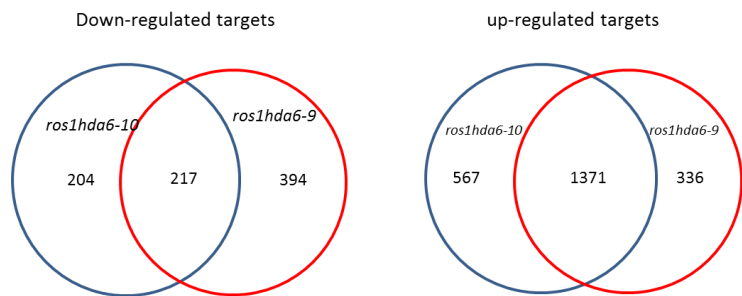

Figure S5. Comparison of up- or down- regulated targets between two *hda6* alleles relative to the *ros1-1* mutant.

Table S1. Targets with significant difference between *ros1hda6-10* and *ros1hda6-9*.

| ros1hda6-10 vs ros1hda6-9   |         |                      |                          |         |       |
|-----------------------------|---------|----------------------|--------------------------|---------|-------|
| fold change greater than +2 |         |                      | fold change less than -2 |         |       |
| AGI gene                    | non-AGI | transposable element | AGI gene                 | non-AGI | total |
| 256                         | 32      | 29                   | 127                      | 16      | 460   |

  

| ros1hda6-9 VS ros1hda6-10   |         |                      |                          |         |       |
|-----------------------------|---------|----------------------|--------------------------|---------|-------|
| fold change greater than +2 |         |                      | fold change less than -2 |         |       |
| AGI gene                    | non-AGI | transposable element | AGI gene                 | non-AGI | total |
| 232                         | 13      | 13                   | 56                       | 7       | 321   |

Table S2. Primers used in this study.

|                                  |                          |                                         |
|----------------------------------|--------------------------|-----------------------------------------|
| primers for q(RT)-PCR            | qPCR-LUC-f               | TGCAACTCCGATAAATAACGCGCC                |
|                                  | qPCR-LUC-r               | AAATGTCCGTTCCGGTTGGCAGAAG               |
|                                  | qPCR-RD29A-F             | ACGACAAGAATTCTCCGATGGGCT                |
|                                  | qPCR-RD29A-R             | TCCGCGCAATACTCGTTTCTTCCA                |
|                                  | qPCR-NPTII-F             | tgaatgaactgcaggacgag                    |
|                                  | qPCR-NPTII-R             | atactttctcggcaggagca                    |
|                                  | qPCR-UBQ3-F              | TCTCATGCACCTGGGAGGTGAAC                 |
|                                  | qPCR-UBQ3-R              | AATACAAAGGCCCGTTACAAGCCC                |
|                                  | qPCR-At5g41660-F         | GACGTTGCTACTCTGCCATG                    |
|                                  | qPCR-At5g41660-R         | ATTGCGCCGTTGGAAGTCGTGAG                 |
|                                  | qPCR-Actin2-F            | TGCTTATGTCGCTCTTGACTAC                  |
|                                  | qPCR-Actin2-R            | CTCTCAGCTCCGATGGTTATG                   |
|                                  | qPCR-hda7-F              | GCGATTGCGGTTGGAGAACAAC                  |
|                                  | qPCR-hda7-R              | ACGGTACACTAGGTGCGTGCA                   |
|                                  | qPCR-hda6-F              | GGAGACTACTACTACGGTCAAG                  |
|                                  | qPCR-hda6-R              | GGCTAGGGCGACTGATTCTAAG                  |
|                                  | qPCR-CMT3-f              | AGACCTGCGACAAGGATGACACT                 |
|                                  | qPCR-CMT3-r              | ATTGGCTCGTCTAGAAACCTCGCA                |
| primers for RT-PCR               | 106B repeats-F           | TTGATTGATAGATCCCTTCTGGA                 |
|                                  | 106B repeats-R           | CGAGGATGGGGTAATTGAGT                    |
|                                  | 180bp-F                  | ACCATCAAGCCTTGAGAAGCA                   |
|                                  | 180bp-R                  | CCGTATGAGTCTTTGTCTTTGTATCTTCT           |
|                                  | solo LTR A-F             | ATCAATTATTATGTCATGTTAAACCGATTG          |
|                                  | solo LTR A-R             | TGTTTCGAGTTTTATTCTCTCTAGTCTTCATT        |
|                                  | Amplicon 1-F             | CTCGAGGTTAAATGTTATTACTTGGTAAGATTCCGG    |
|                                  | Amplicon 1-R             | TGGGTTTGTGCATATTGAACGTTTGTGTTTCATATCACC |
|                                  | TA3 middle-F             | GATTCTTACTGTAAAGAACATGGCATTGAGAGA       |
|                                  | TA3 middle-R             | TCCAAATTTCTGAGGTGCTTGTAAAC              |
|                                  | TSI-F                    | CACCTCTGTTAATCCAAGTAGCTGACTCTCC         |
|                                  | TSI-R                    | GGGCTTTGCCCCTTTCAATAGCT                 |
|                                  | G1136-F                  | CTTCACTCTCCGTACGCTCCTCA                 |
|                                  | G1136-R                  | CATCTAGATATTAGCGATTGGAAGAAG             |
|                                  | AtMul-F                  | GTGGATATACCAAAACACAA                    |
|                                  | AtMul-R                  | CAATGAGAAGGAGTATGGGAAGA                 |
|                                  | IGN5B-F                  | CGCAGCGGAATTGACATCCTATC                 |
|                                  | IGN5B-R                  | TCGGAAAGAGACTCTCCGCTAGAAA               |
|                                  | IGN6-F                   | GGGACATCTATTGGGTTAGGCTGGATG             |
|                                  | IGN6-R                   | TTTGAATTCTCAGTTCCGGGTATCTGCTTG          |
| primers for Y2H                  | IGN15-F                  | CCATAGCATAGAAAAGTTGGCGATATATGAA         |
|                                  | IGN15-R                  | CGGAAAAGGTAAGGTGGTTGGAAAA               |
|                                  | BD-hda6-Ndel-F           | TTAAcatatgATGGAGGCAGACGAAAGC            |
|                                  | BD-hda6-EcoRI-R          | AATTgaattcTTAAGACGATGGAGGATTCACG        |
|                                  | BD-hda6-INS467-EcoRI-R   | AATTgaattcTTACACTAGCATCTGAATTCATAACC    |
|                                  | BD-hda6-DEL340-EcoRI-R   | AAATTgaattcTTAACCAATAGAACCTCCGGC        |
|                                  | BD-hda6(1-467aa)-EcoRI-R | AATTgaattcATTCACGCTCTGGCTCTGG           |
|                                  | AD-MET1 R2FB-Ndel-F      | TTAAcatatgATGGTGGCTGTAGGTGG             |
|                                  | AD-MET1 R2FB-XhoI-R      | AATTctcgagTGGAAAGACTAAAGAATCCC          |
| Primers for Bisulfite sequencing | RD29AtransBi-F1          | ATATGATGGGTTAATAGATATGGAT               |
|                                  | RD29AtransBi-F2          | AATATTTAGTTTTTTTGTAAATATA               |
|                                  | RD29AtransBi-R1          | ATTCTATAATTTATATTCACCCATATC             |
|                                  | RD29AtransBi-R2          | AAATATTCACATA CATAATATTCACC             |
|                                  | 35S promoterBi-F         | aGTAGAAAAGGAAGGTGGtAtTatAAATG           |
|                                  | 35S promoterBi-R         | GGGTGGAGAGGTTATTTGGTTATG                |
| Primers for chop-PCR             | Chop-PCR-Amplicon 3-F    | CGACCGGGTCCGAGGATTTCG                   |
|                                  | Chop-PCR-Amplicon 3-R    | AACAGACATTGAAATGTCT                     |
|                                  | Chop-PCR-35S promoter-F  | ATCATTGCGATAAAGGAAAGG                   |
|                                  | Chop-PCR-35S promoter-R  | TGGAAGTATCACATCAATCC                    |
|                                  | AtSN1-HaeIII-F           | ACTTAATTAGCACTCAAATTAACAAAATAAGT        |
|                                  | AtSN1-HaeIII-R           | TTTAAACATAAGAAGAAGTTCCTTTTTCATCTAC      |
| primers for CHIP                 | RD29A-chip-F             | ATCAAGCCGACACAGACACGCG                  |
|                                  | RD29A-chip-R             | AACAGAGGAGGGTCTCACTAAG                  |
|                                  | 35S promoter Chip-F      | GGAAAGGCTATCATTCAAGATGCCTCTGC           |
|                                  | 35S promoter Chip-R      | TGGAAGTATCACATCAATCCACTTGCTTT           |
| primers for complementary        | hda6-CP-f                | ACGAAGCCCGATAATGACTG                    |
|                                  | hda6-cp-r                | GGTGAGAGTCGGTTCCGGATA                   |
| primers for genotypes            | ID-hda6-DEL340-F         | AATGTCGGTGAGGATTGTCC                    |
|                                  | ID-hda6-DEL340-R         | TTGATAGCGATATCAGCGTCC                   |
